# Supplementary material
Source: publisher figshare collection journal article supplement (https://acs.figshare.com/ndownloader/files/5456384)
Supplement: Supplementary file 1 [file 5456384]

## Supporting Information

# **Formation, electronic structure and defects of Ni substituted spinel cobalt oxide: a DFT+U study**

Xiao Shi<sup>†</sup>, Steven L. Bernasek<sup>†±</sup>, and Annabella Selloni<sup>†\*</sup>

<sup>†</sup> Department of Chemistry, Princeton University, Princeton, New Jersey 08544, United States  
<sup>±</sup> Science Division, Yale-NUS College, Singapore, 138609

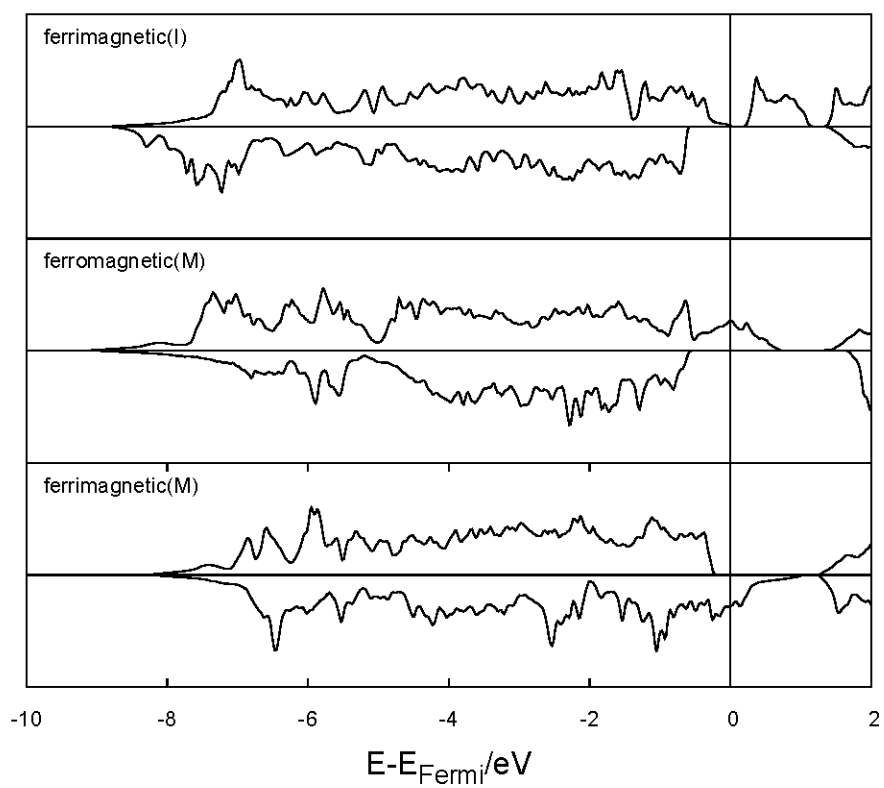

**Figure S1**, DOS calculated for the insulating ferrimagnetic (I) (top panel), metallic ferromagnetic (M) (middle panel), and metallic ferrimagnetic (M) (bottom panel) configurations of NiCo<sub>2</sub>O<sub>4</sub>.

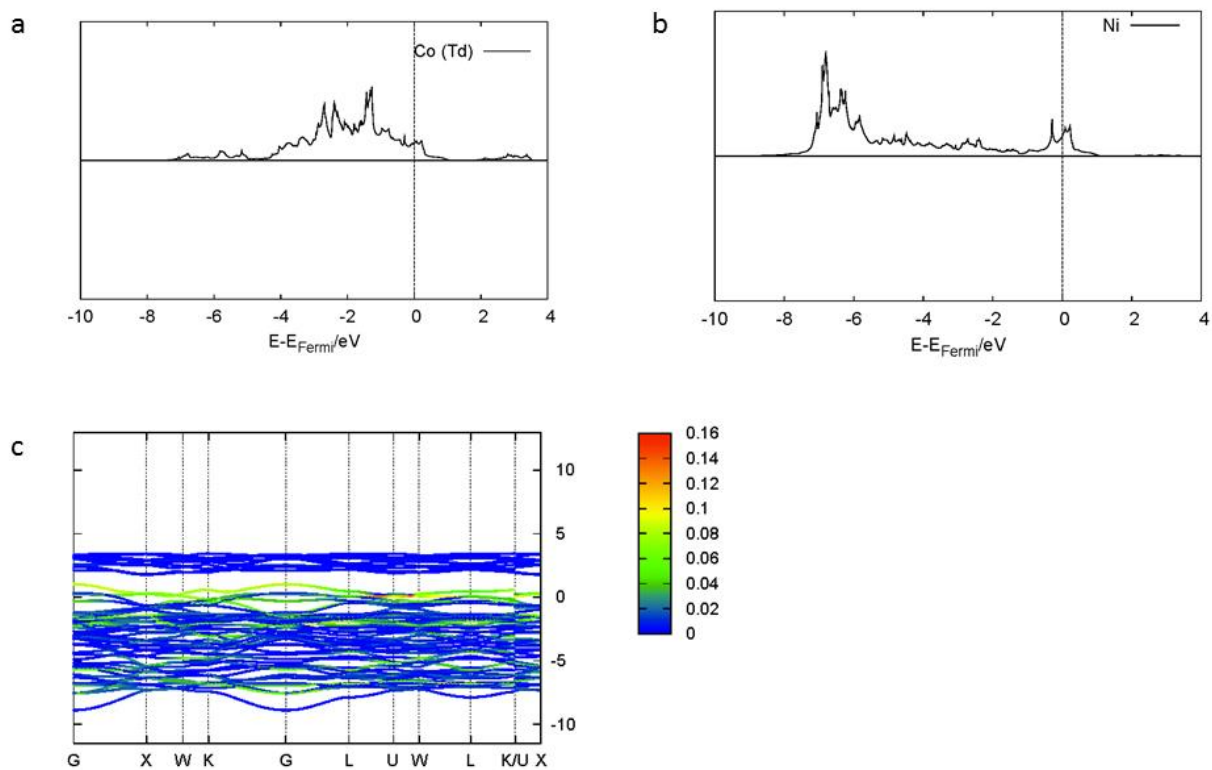

**Figure S2** Projected DOS calculated for the  $e/e_g$  states of (a), Co (Td) and (b), Ni. The fractional valence calculated from this PDOS is  $\sim 2.1+$  for both Co(Td) and Ni. (c) Band structure around the Fermi level; different colors indicate the contribution of the oxygen orbitals.

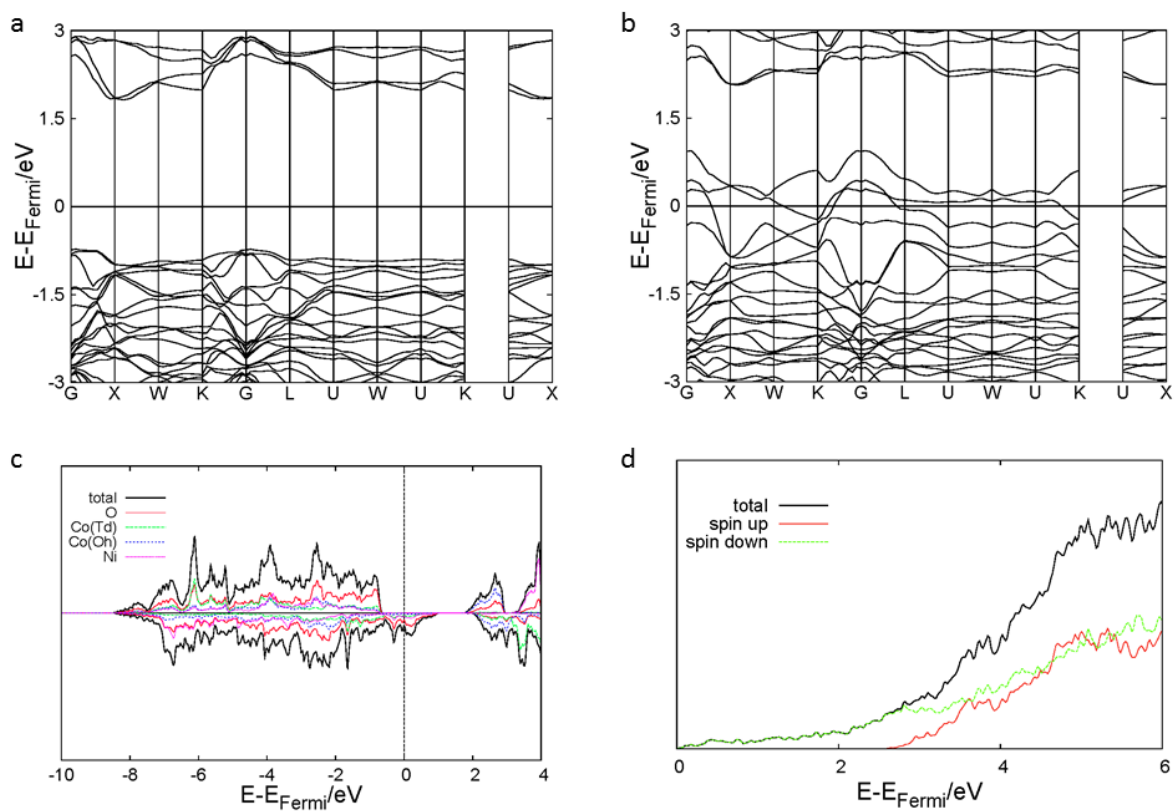

**Figure S3** Electronic structure of NCO calculated using norm conserving pseudopotentials with U terms from linear response: band structure for (a) majority and (b) minority spins; (c) Projected DOS, and (d) Joint DOS. The JDOS suggests an optical band gap of  $\sim 2.5$  eV for the majority spins and absorption at long wavelengths for the minority spins.

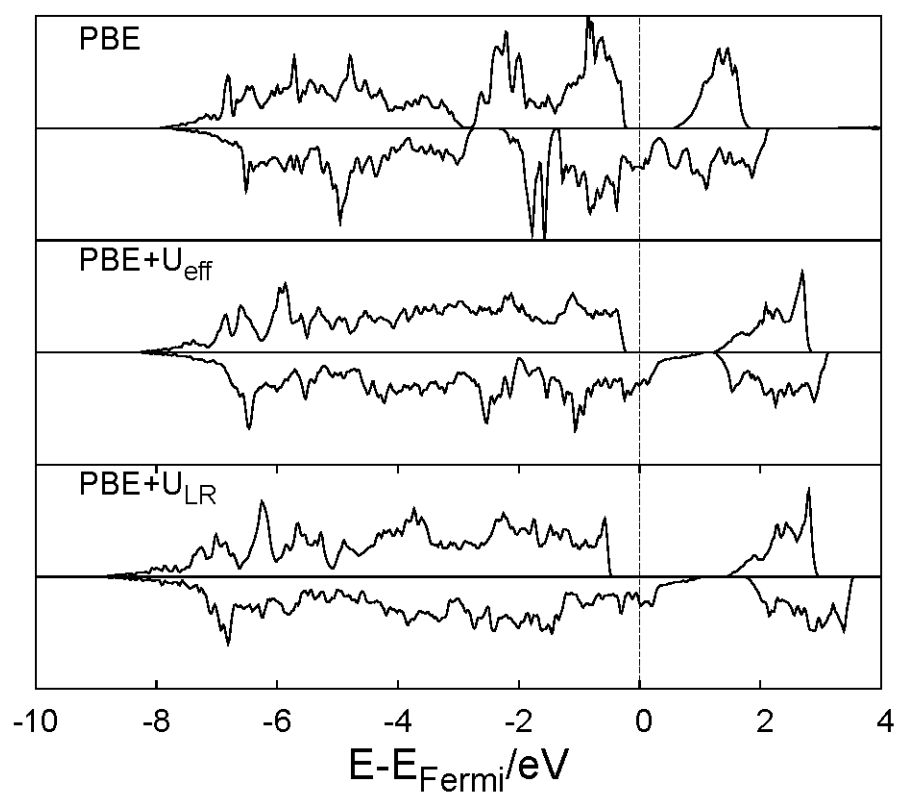

**Figure S4** DOS of pristine NCO calculated using different  $U$  values, as indicated.

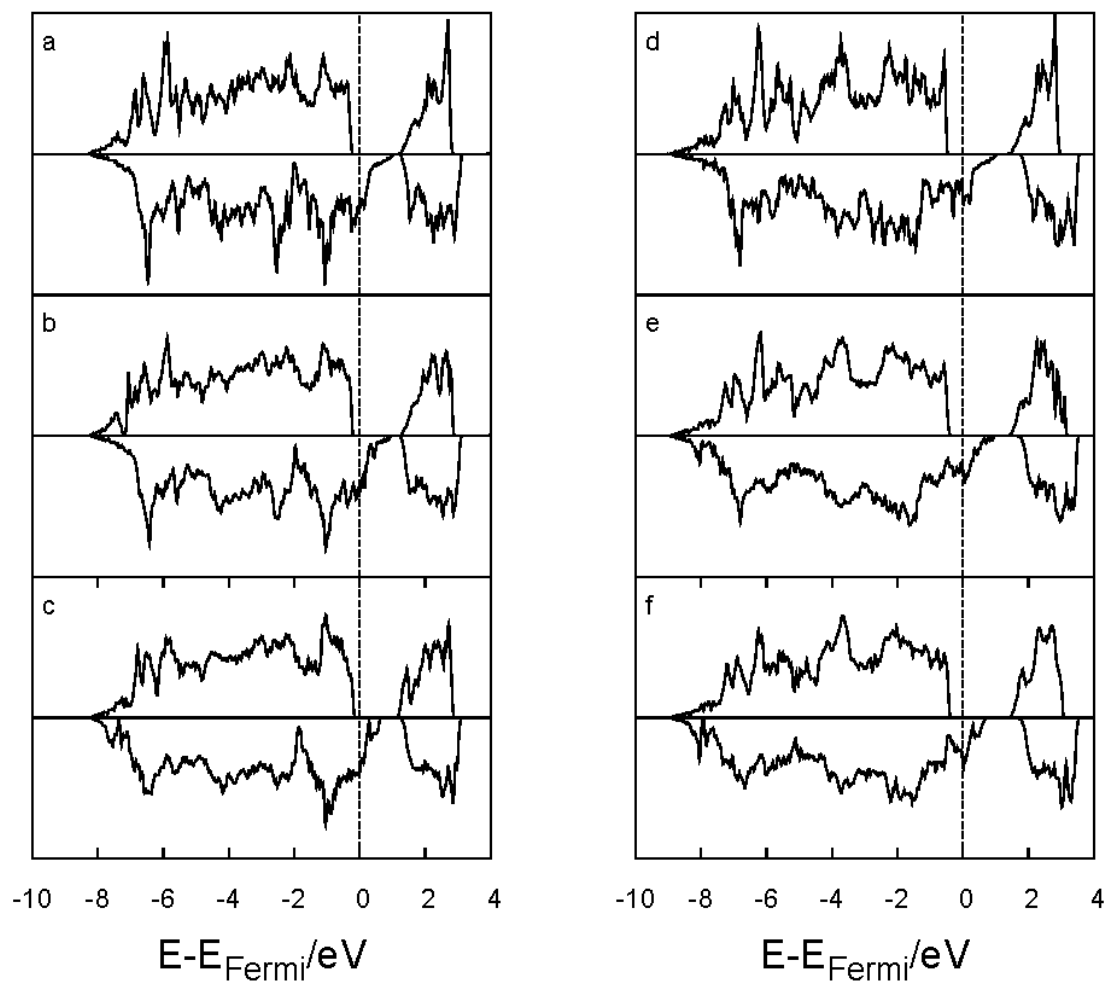

**Figure S5** DOS calculated using  $U_{\text{eff}}$  (left) and  $U_{\text{LR}}$  (right) with: (a,d) no substitution, (b,e) 1/8 substitution and (c,f) 1/4 substitution.

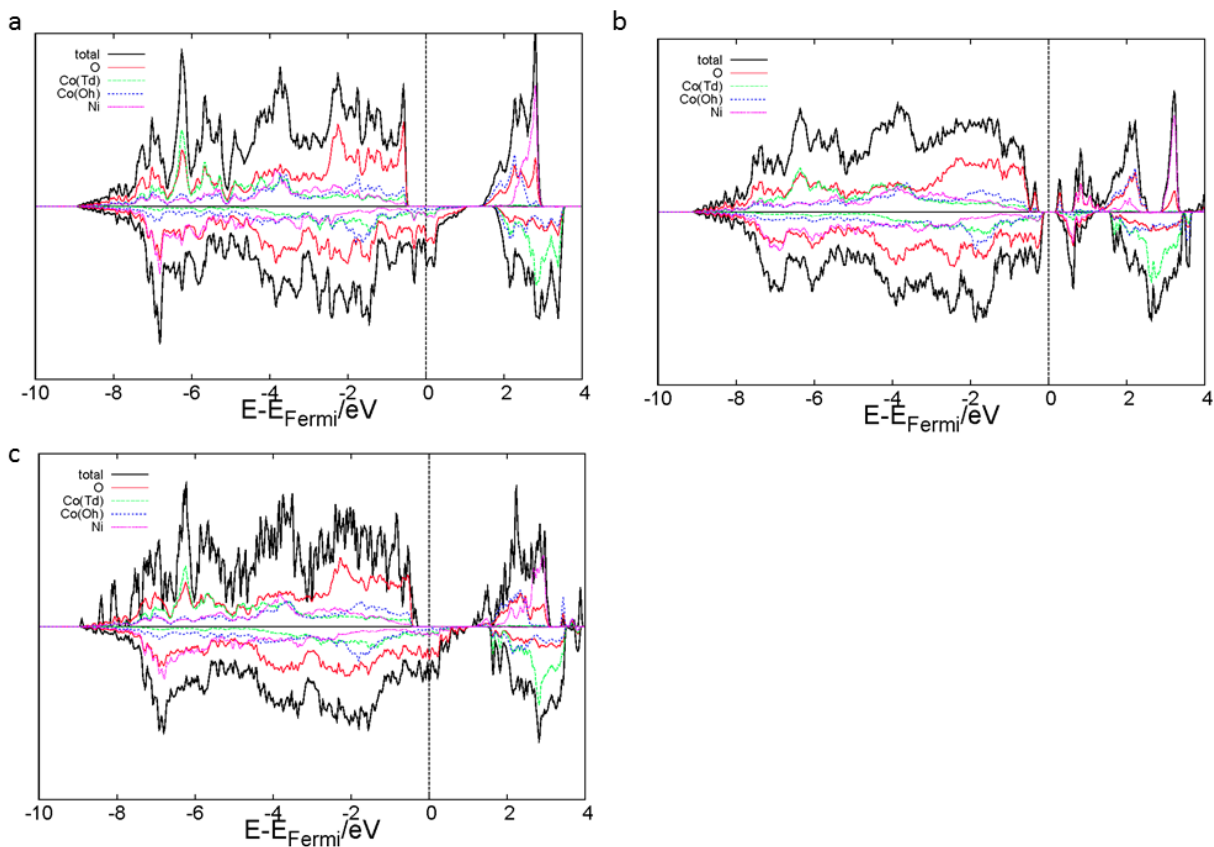

**Figure S6** PDOS of defect free bulk (a), oxygen vacancy on Site A (b) and oxygen vacancy on Site B (c), calculated using DFT+ $U_{LR}$ .

**Corresponding Author:**

†aselloni@exchange.Princeton.EDU

**Address:**

Frick Laboratory, Princeton University, Princeton, 08544, United States
